# Supplementary material for: Acceleration Data Reveal Highly Individually Structured Energetic Landscapes in Free-Ranging Fishers (Pekania pennanti)
Source: PLOS journal article supplement (doi:10.1371/journal.pone.0145732), 2016-02-03
Supplement: S5 (10.1371/journal.pone.0145732.s005) [file journal.pone.0145732.s005]

## S1 Table. Supplementary information of the tracked individuals

| Individuals | Total number of  | Accelerometer     |                  |
|-------------|------------------|-------------------|------------------|
|             | points collected | GPS fix rate      | settings         |
| F01         | 17600            | Dynamic sampling* | High sensitivity |
| F02         | 1077             | 10 min            | High sensitivity |
| F03         | 874              | 10 min            | High sensitivity |
| F04         | 10429            | Dynamic sampling* | High sensitivity |
| F05         | 3444             | Dynamic sampling* | High sensitivity |
| F06         | 1541             | Dynamic sampling* | High sensitivity |
| F07         | 2824             | Dynamic sampling* | High sensitivity |
| F08         | 1349             | 10 min            | Low sensitivity  |
| F09         | 919              | 15 min            | High sensitivity |
| F10         | 2616             | Dynamic sampling* | High sensitivity |
| F11         | 748              | 10 min            | Low sensitivity  |
| F12         | 1638             | 10 min            | Low sensitivity  |

\*GPS fixes every two minutes when the animal was highly active (e.g., running), every 10 minutes at moderate activity, and every 60 minutes during low activity (e.g., resting) (Brown et al. 2012)

## References

Brown DD, LaPoint SD, Kays R, Heidrich W, Kümmereth F, Wikelski M. Accelerometer-informed GPS telemetry: Reducing the trade-off between resolution and longevity. *Wildl Soc Bull.* 2012;36: 139–146.
