# Supplementary material for: Acceleration Data Reveal Highly Individually Structured Energetic Landscapes in Free-Ranging Fishers (Pekania pennanti)
Source: PLOS journal article supplement (doi:10.1371/journal.pone.0145732), 2016-02-03
Supplement: S6 (10.1371/journal.pone.0145732.s006) [file journal.pone.0145732.s006]

**S2 Table. Environmental variables included in the analyses**

| Variable                        | Description                                                                                                                                |
|---------------------------------|--------------------------------------------------------------------------------------------------------------------------------------------|
| Land cover:                     |                                                                                                                                            |
| - developed low                 | Developed open space and developed low intensity*                                                                                          |
| - developed high                | Developed medium intensity and developed high intensity*                                                                                   |
| - deciduous forest              | Deciduous forest*                                                                                                                          |
| - evergreen forest              | Evergreen forest*                                                                                                                          |
| - mixed forest                  | Mixed forest*                                                                                                                              |
| - shrub                         | Shrub/scrub*                                                                                                                               |
| - grassland                     | Grassland/herbaceous*                                                                                                                      |
| - crop                          | Pasture/ hay and cultivated crops*                                                                                                         |
| - woody wetland                 | Woody wetland*                                                                                                                             |
| - herbaceous wetland            | Emergent Herbaceous Wetlands*                                                                                                              |
| - barren                        | Barren land*                                                                                                                               |
| - open water                    | Open water*                                                                                                                                |
| Distance to the forest edge (m) | Distance to deciduous, evergreen and mixed forest*. Positive values from inside the forest, and negative values from outside of the forest |
| Proportion of urban area (%)    | % of developed high, medium and low intensity* within a 240 m radius circle from each 30m grid cell                                        |
| Landscape heterogeneity         | Number of different land cover types within a 240 m radius circle from each 30m grid cell                                                  |
| Distance to roads (m)           | Distance from each grid cell to highways and paved roads <sup>#</sup>                                                                      |

\*Classes correspond to the classification of the National Land Cover Database 2011 legend (Jin et al. 2011, NLCD11)

<sup>#</sup>Classification as provided by the United State Census Bureau (2011)

## References

Jin S, Yang L, Danielson P, Homer C, Fry J, Xian G. A comprehensive change detection method for updating the National Land Cover Database to circa 2011. *Remote Sens Environ.* 2013;132: 159–175.

NLCD11. National Land Cover Database 2011. Available:

<http://www.mrlc.gov/nlcd2011.php>

United States Census Bureau. TIGER/Line® Shapefiles and TIGER/Line® Files. 2011;

Available: <https://www.census.gov/geo/maps-data/data/tiger-line.html>
