# Supplementary material for: Acceleration Data Reveal Highly Individually Structured Energetic Landscapes in Free-Ranging Fishers (Pekania pennanti)
Source: PLOS journal article supplement (doi:10.1371/journal.pone.0145732), 2016-02-03
Supplement: S7 (10.1371/journal.pone.0145732.s007) [file journal.pone.0145732.s007]

**S3 Table. AICc values of GAMs including environmental variables.** For each individual all possible combinations of the environmental variables were tested. Within each individual, the models are sorted by increasing  $\Delta$ AIC values.

| Intercept  | Dist. Forest edge | Dist. Roads   | Land cover | Proportion developed | Landscape heterogeneity | s(Space) | s(Time of day) | AICc       | $\Delta$ AIC | Indiv. |
|------------|-------------------|---------------|------------|----------------------|-------------------------|----------|----------------|------------|--------------|--------|
| 0.51553277 | NA                | NA            | NA         | NA                   | -0.0168413891           | +        | +              | -1715.2139 | 0.00000000   | F1     |
| 0.51553069 | NA                | NA            | NA         | 0.00000000           | -0.0168408305           | +        | +              | -1715.2074 | 0.006522108  | F1     |
| 0.48359502 | NA                | 4.777449e-05  | NA         | NA                   | -0.0162818549           | +        | +              | -1714.4327 | 0.781264177  | F1     |
| 0.48360045 | NA                | 4.776292e-05  | NA         | 0.00000000           | -0.0162813735           | +        | +              | -1714.4263 | 0.787677786  | F1     |
| 0.53503361 | NA                | NA            | +          | NA                   | -0.0188670597           | +        | +              | -1714.1481 | 1.065837483  | F1     |
| 0.53503362 | NA                | NA            | +          | 0.00000000           | -0.0188662115           | +        | +              | -1714.1407 | 1.073215573  | F1     |
| 0.51729367 | -3.410885e-06     | NA            | NA         | NA                   | -0.0169310722           | +        | +              | -1713.8841 | 1.329842608  | F1     |
| 0.51728584 | -3.399514e-06     | NA            | NA         | 0.00000000           | -0.0169302459           | +        | +              | -1713.8777 | 1.336238271  | F1     |
| 0.48912749 | -2.339468e-05     | 5.734013e-05  | NA         | NA                   | -0.0167445104           | +        | +              | -1713.3885 | 1.825436075  | F1     |
| 0.48912884 | -2.337667e-05     | 5.732112e-05  | NA         | 0.00000000           | -0.0167437071           | +        | +              | -1713.3821 | 1.831812276  | F1     |
| 0.52450587 | NA                | 1.823139e-05  | +          | NA                   | -0.0186535811           | +        | +              | -1713.0764 | 2.137561531  | F1     |
| 0.52451131 | NA                | 1.822200e-05  | +          | 0.00000000           | -0.0186528313           | +        | +              | -1713.0692 | 2.144764222  | F1     |
| 0.53908472 | -9.758053e-06     | NA            | +          | NA                   | -0.0191209465           | +        | +              | -1712.9761 | 2.237844810  | F1     |
| 0.53907741 | -9.740387e-06     | NA            | +          | 0.00000000           | -0.0191196812           | +        | +              | -1712.9687 | 2.245186403  | F1     |
| 0.52802537 | -1.889631e-05     | 2.572692e-05  | +          | NA                   | -0.0190417051           | +        | +              | -1712.0826 | 3.131350291  | F1     |
| 0.52802632 | -1.887222e-05     | 2.570804e-05  | +          | 0.00000000           | -0.0190405012           | +        | +              | -1712.0753 | 3.138637201  | F1     |
| 0.45284235 | NA                | NA            | NA         | NA                   | NA                      | +        | +              | -1711.4561 | 3.757850744  | F1     |
| 0.45284235 | NA                | NA            | NA         | 0.00000000           | NA                      | +        | +              | -1711.4495 | 3.764401244  | F1     |
| 0.40090757 | NA                | 8.310711e-05  | NA         | NA                   | NA                      | +        | +              | -1711.2602 | 3.953732210  | F1     |
| 0.40091526 | NA                | 8.309480e-05  | NA         | 0.00000000           | NA                      | +        | +              | -1711.2537 | 3.960195554  | F1     |
| 0.42896110 | 5.707965e-05      | NA            | NA         | NA                   | NA                      | +        | +              | -1710.0455 | 5.168447340  | F1     |
| 0.42895814 | 5.708672e-05      | NA            | NA         | 0.00000000           | NA                      | +        | +              | -1710.0391 | 5.174872334  | F1     |
| 0.39623571 | 3.234982e-05      | 6.892466e-05  | NA         | NA                   | NA                      | +        | +              | -1709.7141 | 5.499821546  | F1     |
| 0.39624133 | 3.236326e-05      | 6.890666e-05  | NA         | 0.00000000           | NA                      | +        | +              | -1709.7077 | 5.506204365  | F1     |
| 0.45600622 | NA                | NA            | +          | NA                   | NA                      | +        | +              | -1708.5377 | 6.676256900  | F1     |
| 0.45600900 | NA                | NA            | +          | 0.00000000           | NA                      | +        | +              | -1708.5302 | 6.683704028  | F1     |
| 0.42444484 | NA                | 6.005194e-05  | +          | NA                   | NA                      | +        | +              | -1707.9852 | 7.228692605  | F1     |
| 0.42445385 | NA                | 6.004076e-05  | +          | 0.00000000           | NA                      | +        | +              | -1707.9779 | 7.235991959  | F1     |
| 0.43709540 | 6.063262e-05      | NA            | +          | NA                   | NA                      | +        | +              | -1707.0042 | 8.209710406  | F1     |
| 0.43709518 | 6.064345e-05      | NA            | +          | 0.00000000           | NA                      | +        | +              | -1706.9968 | 8.217105817  | F1     |
| 0.42044710 | 4.607285e-05      | 4.025691e-05  | +          | NA                   | NA                      | +        | +              | -1706.3114 | 8.902539298  | F1     |
| 0.42045467 | 4.609013e-05      | 4.023852e-05  | +          | 0.00000000           | NA                      | +        | +              | -1706.3041 | 8.909859807  | F1     |
| 0.49248800 | NA                | NA            | NA         | NA                   | NA                      | +        | +              | -356.0058  | 0.00000000   | F2     |
| 0.49248800 | NA                | NA            | NA         | 0.00000000           | NA                      | +        | +              | -355.9330  | 0.072719813  | F2     |
| 0.49289646 | NA                | -1.030512e-06 | NA         | NA                   | NA                      | +        | +              | -355.3288  | 0.676915316  | F2     |
| 0.49283171 | NA                | -8.671629e-07 | NA         | 0.00000000           | NA                      | +        | +              | -355.2579  | 0.747890747  | F2     |
| 0.48203118 | 6.280356e-05      | NA            | NA         | NA                   | NA                      | +        | +              | -354.9700  | 1.035756697  | F2     |
| 0.48202675 | 6.283014e-05      | NA            | NA         | 0.00000000           | NA                      | +        | +              | -354.8980  | 1.107782947  | F2     |
| 0.49189161 | 7.230696e-05      | -2.886912e-05 | NA         | NA                   | NA                      | +        | +              | -354.5034  | 1.502386811  | F2     |
| 0.49182549 | 7.227270e-05      | -2.868790e-05 | NA         | 0.00000000           | NA                      | +        | +              | -354.4334  | 1.572331458  | F2     |
| 0.49905033 | NA                | NA            | NA         | NA                   | -0.0015564940           | +        | +              | -354.2701  | 1.735680153  | F2     |
| 0.49907143 | NA                | NA            | NA         | 0.00000000           | -0.0015614986           | +        | +              | -354.1983  | 1.807477651  | F2     |
| 0.50171857 | NA                | -5.764143e-06 | NA         | NA                   | -0.0016474591           | +        | +              | -353.5803  | 2.425491185  | F2     |
| 0.50166289 | NA                | -5.605048e-06 | NA         | 0.00000000           | -0.0016492113           | +        | +              | -353.5105  | 2.495290149  | F2     |
| 0.47707743 | 6.734442e-05      | NA            | NA         | NA                   | 0.0009956334            | +        | +              | -353.1154  | 2.890325830  | F2     |
| 0.47708251 | 6.736213e-05      | NA            | NA         | 0.00000000           | 0.0009937285            | +        | +              | -353.0450  | 2.960740709  | F2     |
| 0.48790312 | 7.551523e-05      | -2.818828e-05 | NA         | NA                   | 0.0007553064            | +        | +              | -352.6212  | 3.384518415  | F2     |
| 0.48783958 | 7.547904e-05      | -2.800800e-05 | NA         | 0.00000000           | 0.0007548597            | +        | +              | -352.5529  | 3.452900041  | F2     |
| 0.44017942 | NA                | NA            | +          | NA                   | NA                      | +        | +              | -345.8715  | 10.134247013 | F2     |
| 0.44011930 | NA                | NA            | +          | 0.00000000           | NA                      | +        | +              | -345.7527  | 10.253062043 | F2     |
| 0.43108378 | NA                | 2.734067e-05  | +          | NA                   | NA                      | +        | +              | -344.8989  | 11.106824202 | F2     |
| 0.43093564 | NA                | 2.760727e-05  | +          | 0.00000000           | NA                      | +        | +              | -344.7776  | 11.228190959 | F2     |
| 0.43080689 | 1.082037e-04      | NA            | +          | NA                   | NA                      | +        | +              | -343.7631  | 12.242652248 | F2     |
| 0.43074471 | 1.083683e-04      | NA            | +          | 0.00000000           | NA                      | +        | +              | -343.6319  | 12.373835898 | F2     |
| 0.46593063 | NA                | NA            | +          | NA                   | -0.0073242672           | +        | +              | -343.6235  | 12.382257471 | F2     |

| Intercept   | Dist. Forest edge | Dist. Roads   | Land cover | Proportion developed | Landscape heterogeneity | s(Space) | s(Time of day) | AICc       | ΔAIC         | Indiv. |
|-------------|-------------------|---------------|------------|----------------------|-------------------------|----------|----------------|------------|--------------|--------|
| 0.43495045  | 1.115031e-04      | -1.236271e-05 | +          | NA                   | NA                      | +        | +              | -343.5575  | 12.448310645 | F2     |
| 0.46593243  | NA                | NA            | +          | 0.000000000          | -0.0073403562           | +        | +              | -343.4975  | 12.508269865 | F2     |
| 0.43480539  | 1.115720e-04      | -1.210168e-05 | +          | 0.000000000          | NA                      | +        | +              | -343.4290  | 12.576790031 | F2     |
| 0.46252673  | NA                | 7.844801e-06  | +          | NA                   | -0.0070486296           | +        | +              | -343.0477  | 12.958021599 | F2     |
| 0.46241713  | NA                | 8.100435e-06  | +          | 0.000000000          | -0.0070577877           | +        | +              | -342.9226  | 13.083161375 | F2     |
| 0.44413574  | 9.200211e-05      | NA            | +          | NA                   | -0.0033718110           | +        | +              | -342.0368  | 13.968961794 | F2     |
| 0.44410250  | 9.213457e-05      | NA            | +          | 0.000000000          | -0.0033790596           | +        | +              | -341.9066  | 14.099144471 | F2     |
| 0.45038998  | 9.615917e-05      | -1.711228e-05 | +          | NA                   | -0.0035332863           | +        | +              | -341.8829  | 14.122884815 | F2     |
| 0.45026091  | 9.621226e-05      | -1.685301e-05 | +          | 0.000000000          | -0.0035372338           | +        | +              | -341.7558  | 14.249969798 | F2     |
| 0.49377385  | NA                | NA            | NA         | NA                   | NA                      | +        | +              | -330.0687  | 0.000000000  | F3     |
| 0.49377385  | NA                | NA            | NA         | 0.000000000          | NA                      | +        | +              | -329.9572  | 0.111497165  | F3     |
| 0.48232160  | NA                | NA            | NA         | NA                   | 0.0017794976            | +        | +              | -328.6224  | 1.446367096  | F3     |
| 0.48281114  | NA                | NA            | NA         | 0.000000000          | 0.0017034310            | +        | +              | -328.4925  | 1.576174837  | F3     |
| 0.50566968  | -3.010230e-04     | NA            | NA         | NA                   | NA                      | +        | +              | -327.8575  | 2.211208316  | F3     |
| 0.50569272  | -3.016059e-04     | NA            | NA         | 0.000000000          | NA                      | +        | +              | -327.7398  | 2.328945690  | F3     |
| 0.45348035  | NA                | 1.425371e-04  | NA         | NA                   | NA                      | +        | +              | -327.5178  | 2.550927393  | F3     |
| 0.45306283  | NA                | 1.440141e-04  | NA         | 0.000000000          | NA                      | +        | +              | -327.3872  | 2.681550938  | F3     |
| 0.49275233  | -3.006511e-04     | NA            | NA         | NA                   | 0.0020048672            | +        | +              | -326.4926  | 3.576093429  | F3     |
| 0.43273135  | NA                | 1.461145e-04  | NA         | NA                   | 0.0030669267            | +        | +              | -326.4468  | 3.621885071  | F3     |
| 0.49325119  | -3.012041e-04     | NA            | NA         | 0.000000000          | 0.0019307480            | +        | +              | -326.3578  | 3.710951580  | F3     |
| 0.43277753  | NA                | 1.474299e-04  | NA         | 0.000000000          | 0.0030019745            | +        | +              | -326.3050  | 3.763699793  | F3     |
| 0.43676659  | -3.821071e-04     | 2.550779e-04  | NA         | NA                   | NA                      | +        | +              | -322.4217  | 7.647026897  | F3     |
| 0.43629537  | -3.836484e-04     | 2.569602e-04  | NA         | 0.000000000          | NA                      | +        | +              | -322.2558  | 7.812910263  | F3     |
| 0.41038814  | -3.830786e-04     | 2.611429e-04  | NA         | NA                   | 0.0038383472            | +        | +              | -321.6293  | 8.439393833  | F3     |
| 0.41035644  | -3.845405e-04     | 2.628663e-04  | NA         | 0.000000000          | 0.0037765468            | +        | +              | -321.4538  | 8.614888660  | F3     |
| 0.57871822  | NA                | NA            | +          | NA                   | NA                      | +        | +              | -314.0859  | 15.982790647 | F3     |
| 0.57870616  | NA                | NA            | +          | 0.000000000          | NA                      | +        | +              | -313.9515  | 16.117232119 | F3     |
| 0.56800644  | NA                | NA            | +          | NA                   | 0.0017797970            | +        | +              | -312.3266  | 17.742162562 | F3     |
| 0.56866617  | NA                | NA            | +          | 0.000000000          | 0.0016715115            | +        | +              | -312.1530  | 17.915698745 | F3     |
| 0.57456044  | -2.720802e-04     | NA            | +          | NA                   | NA                      | +        | +              | -312.0791  | 17.989610339 | F3     |
| 0.57449107  | -2.726798e-04     | NA            | +          | 0.000000000          | NA                      | +        | +              | -311.9436  | 18.125157250 | F3     |
| 0.54045871  | NA                | 1.621540e-04  | +          | NA                   | NA                      | +        | +              | -310.9076  | 19.161141142 | F3     |
| 0.54008242  | NA                | 1.638106e-04  | +          | 0.000000000          | NA                      | +        | +              | -310.7474  | 19.321356920 | F3     |
| 0.56248671  | -2.715982e-04     | NA            | +          | NA                   | 0.0020479529            | +        | +              | -310.4014  | 19.667335315 | F3     |
| 0.56308628  | -2.721509e-04     | NA            | +          | 0.000000000          | 0.0019396504            | +        | +              | -310.2272  | 19.841510528 | F3     |
| 0.51941701  | NA                | 1.660743e-04  | +          | NA                   | 0.0033076556            | +        | +              | -309.7253  | 20.343400099 | F3     |
| 0.51968727  | NA                | 1.675122e-04  | +          | 0.000000000          | 0.0032136054            | +        | +              | -309.5371  | 20.531580445 | F3     |
| 0.51579653  | -3.518147e-04     | 2.413731e-04  | +          | NA                   | NA                      | +        | +              | -307.1044  | 22.964295800 | F3     |
| 0.51529195  | -3.533036e-04     | 2.431990e-04  | +          | 0.000000000          | NA                      | +        | +              | -306.9348  | 23.133966503 | F3     |
| 0.49067106  | -3.529216e-04     | 2.480222e-04  | +          | NA                   | 0.0039601114            | +        | +              | -306.1325  | 23.936175466 | F3     |
| 0.49081110  | -3.543023e-04     | 2.496283e-04  | +          | 0.000000000          | 0.0038665739            | +        | +              | -305.9345  | 24.134244475 | F3     |
| 0.39005716  | -6.181833e-04     | NA            | +          | NA                   | 0.0127404134            | +        | +              | -1016.2407 | 0.000000000  | F4     |
| 0.39047359  | -6.186046e-04     | -2.387918e-06 | +          | NA                   | 0.0127577191            | +        | +              | -1015.1909 | 1.049746562  | F4     |
| 0.39017211  | -6.227061e-04     | NA            | +          | -0.138788455         | 0.0126856015            | +        | +              | -1015.0519 | 1.188814353  | F4     |
| 0.391133631 | -6.230746e-04     | -4.977568e-06 | +          | -0.141453158         | 0.0126874030            | +        | +              | -1013.9725 | 2.288134672  | F4     |
| 0.48003282  | -6.119177e-04     | NA            | +          | NA                   | NA                      | +        | +              | -1010.0250 | 6.215640920  | F4     |
| 0.47961500  | -6.188066e-04     | NA            | +          | -0.218016416         | NA                      | +        | +              | -1009.0108 | 7.229909895  | F4     |
| 0.49205406  | -6.102630e-04     | -4.880018e-05 | +          | NA                   | NA                      | +        | +              | -1008.8859 | 7.354757618  | F4     |
| 0.49260700  | -6.174601e-04     | -5.282135e-05 | +          | -0.234620970         | NA                      | +        | +              | -1007.8559 | 8.384807678  | F4     |
| 0.40159679  | NA                | NA            | +          | NA                   | 0.0125110209            | +        | +              | -1005.7816 | 10.459111428 | F4     |
| 0.40711873  | NA                | -2.030666e-05 | +          | NA                   | 0.0124307062            | +        | +              | -1004.6904 | 11.550242000 | F4     |
| 0.40125514  | NA                | NA            | +          | 0.064630351          | 0.0125651988            | +        | +              | -1004.3932 | 11.847503361 | F4     |
| 0.40639893  | NA                | -1.889533e-05 | +          | 0.057407727          | 0.0124879666            | +        | +              | -1003.2931 | 12.947541661 | F4     |
| 0.48986714  | NA                | NA            | +          | NA                   | NA                      | +        | +              | -1000.3415 | 15.899182156 | F4     |
| 0.50584574  | NA                | -6.497009e-05 | +          | NA                   | NA                      | +        | +              | -999.2292  | 17.011438979 | F4     |
| 0.48980033  | NA                | NA            | +          | -0.016428462         | NA                      | +        | +              | -999.0325  | 17.208136522 | F4     |
| 0.50588673  | NA                | -6.550467e-05 | +          | -0.037404003         | NA                      | +        | +              | -997.9211  | 18.319615139 | F4     |
| 0.38937821  | -4.613329e-04     | NA            | NA         | NA                   | 0.0096775859            | +        | +              | -993.0797  | 23.160920664 | F4     |
| 0.39730530  | -4.604336e-04     | -2.983383e-05 | NA         | NA                   | 0.0095424401            | +        | +              | -991.9016  | 24.339079878 | F4     |
| 0.38984638  | -4.631040e-04     | NA            | NA         | -0.079162374         | 0.0096532124            | +        | +              | -991.8010  | 24.439672107 | F4     |
| 0.39830142  | -4.623645e-04     | -3.145973e-05 | NA         | -0.090560430         | 0.0095029979            | +        | +              | -990.6000  | 25.640653910 | F4     |
| 0.46046617  | -4.599929e-04     | NA            | NA         | NA                   | NA                      | +        | +              | -989.7636  | 26.477103709 | F4     |
| 0.46096650  | -4.629549e-04     | NA            | NA         | -0.139141318         | NA                      | +        | +              | -988.5784  | 27.662299519 | F4     |

| Intercept  | Dist. Forest edge | Dist. Roads   | Land cover | Proportion developed | Landscape heterogeneity | s(Space) | s(Time of day) | AICc      | ΔAIC         | Indiv. |
|------------|-------------------|---------------|------------|----------------------|-------------------------|----------|----------------|-----------|--------------|--------|
| 0.47574310 | -4.577351e-04     | -6.579430e-05 | NA         | NA                   | NA                      | +        | +              | -988.5325 | 27.708199787 | F4     |
| 0.47697612 | -4.610341e-04     | -6.861588e-05 | NA         | -0.161200026         | NA                      | +        | +              | -987.3312 | 28.909424340 | F4     |
| 0.36649172 | NA                | NA            | NA         | NA                   | 0.0096467803            | +        | +              | -987.0308 | 29.209888056 | F4     |
| 0.37840737 | NA                | -4.422523e-05 | NA         | NA                   | 0.0094331337            | +        | +              | -985.8266 | 30.414031661 | F4     |
| 0.36602954 | NA                | NA            | NA         | 0.053777884          | 0.0096911405            | +        | +              | -985.6678 | 30.572832231 | F4     |
| 0.37774730 | NA                | -4.313188e-05 | NA         | 0.038020016          | 0.0094750452            | +        | +              | -984.4600 | 31.780626162 | F4     |
| 0.43742032 | NA                | NA            | NA         | NA                   | NA                      | +        | +              | -984.1363 | 32.104392120 | F4     |
| 0.45597517 | NA                | -7.932421e-05 | NA         | NA                   | NA                      | +        | +              | -982.9191 | 33.321544010 | F4     |
| 0.43743762 | NA                | NA            | NA         | -0.006840523         | NA                      | +        | +              | -982.8225 | 33.418127566 | F4     |
| 0.45615587 | NA                | -7.974041e-05 | NA         | -0.032949065         | NA                      | +        | +              | -981.6072 | 34.633447572 | F4     |
| 0.28738749 | -3.954497e-04     | NA            | +          | NA                   | -0.0365019473           | +        | +              | -363.8175 | 0.000000000  | F5     |
| 0.28718229 | -3.926321e-04     | NA            | +          | -2.978949450         | -0.0364552028           | +        | +              | -362.3850 | 1.432522192  | F5     |
| 0.26646501 | NA                | NA            | +          | NA                   | -0.0322884776           | +        | +              | -362.0176 | 1.799877933  | F5     |
| 0.26639697 | NA                | NA            | +          | -3.387832627         | -0.0322838333           | +        | +              | -360.7394 | 3.078058302  | F5     |
| 0.32613455 | -3.501629e-04     | -1.728894e-04 | +          | NA                   | -0.0376815000           | +        | +              | -360.5721 | 3.245391700  | F5     |
| 0.32554951 | -3.480168e-04     | -1.712626e-04 | +          | -2.913215691         | -0.0376198760           | +        | +              | -359.1656 | 4.651878457  | F5     |
| 0.32243322 | NA                | -2.347086e-04 | +          | NA                   | -0.0345040487           | +        | +              | -358.4990 | 5.318525854  | F5     |
| 0.32178935 | NA                | -2.324801e-04 | +          | -3.209861914         | -0.0344667067           | +        | +              | -357.2328 | 6.584655127  | F5     |
| 0.09968288 | -2.133755e-04     | NA            | +          | NA                   | NA                      | +        | +              | -355.5171 | 8.300386804  | F5     |
| 0.10056211 | NA                | NA            | +          | NA                   | NA                      | +        | +              | -355.1651 | 8.652426057  | F5     |
| 0.09971542 | -2.108269e-04     | NA            | +          | -3.387669976         | NA                      | +        | +              | -354.1788 | 9.638637827  | F5     |
| 0.10053325 | NA                | NA            | +          | -3.563146675         | NA                      | +        | +              | -353.9225 | 9.894974292  | F5     |
| 0.11409173 | -1.910559e-04     | -7.743858e-05 | +          | NA                   | NA                      | +        | +              | -353.4842 | 10.333249559 | F5     |
| 0.12249125 | NA                | -1.175536e-04 | +          | NA                   | NA                      | +        | +              | -353.0155 | 10.802015983 | F5     |
| 0.11389555 | -1.889582e-04     | -7.618979e-05 | +          | -3.384681038         | NA                      | +        | +              | -352.1589 | 11.658621713 | F5     |
| 0.12214155 | NA                | -1.157616e-04 | +          | -3.513824134         | NA                      | +        | +              | -351.7789 | 12.038586085 | F5     |
| 0.70799644 | NA                | NA            | NA         | NA                   | -0.0292499341           | +        | +              | -344.9148 | 18.902672875 | F5     |
| 0.70794458 | NA                | NA            | NA         | -4.697389186         | -0.0291977117           | +        | +              | -344.1242 | 19.693296935 | F5     |
| 0.73429458 | -2.127589e-04     | NA            | NA         | NA                   | -0.0312272291           | +        | +              | -344.1204 | 19.697059754 | F5     |
| 0.73466544 | -2.169335e-04     | NA            | NA         | -4.916261056         | -0.0311956094           | +        | +              | -343.3492 | 20.468324493 | F5     |
| 0.73860982 | NA                | -1.196636e-04 | NA         | NA                   | -0.0304817079           | +        | +              | -342.3762 | 21.441318171 | F5     |
| 0.53935279 | NA                | NA            | NA         | NA                   | NA                      | +        | +              | -342.0037 | 21.813823682 | F5     |
| 0.75256517 | -1.940201e-04     | -8.029117e-05 | NA         | NA                   | -0.0318875483           | +        | +              | -341.9518 | 21.865690840 | F5     |
| 0.73830488 | NA                | -1.189217e-04 | NA         | -4.705054030         | -0.0304108021           | +        | +              | -341.5995 | 22.217972309 | F5     |
| 0.53961571 | NA                | NA            | NA         | -4.955364834         | NA                      | +        | +              | -341.2378 | 22.579687190 | F5     |
| 0.75255664 | -1.986263e-04     | -7.873057e-05 | NA         | -4.916599906         | -0.0318380624           | +        | +              | -341.1994 | 22.618052088 | F5     |
| 0.54653753 | -1.026067e-04     | NA            | NA         | NA                   | NA                      | +        | +              | -341.0714 | 22.746119912 | F5     |
| 0.54180378 | NA                | -1.247456e-05 | NA         | NA                   | NA                      | +        | +              | -340.7948 | 23.022638079 | F5     |
| 0.54715870 | -1.076147e-04     | NA            | NA         | -5.097982283         | NA                      | +        | +              | -340.3247 | 23.492831686 | F5     |
| 0.54434892 | -1.065648e-04     | 1.254971e-05  | NA         | NA                   | NA                      | +        | +              | -340.0428 | 23.774678059 | F5     |
| 0.54208567 | NA                | -1.256233e-05 | NA         | -4.987603752         | NA                      | +        | +              | -340.0204 | 23.797075218 | F5     |
| 0.54479042 | -1.118207e-04     | 1.356102e-05  | NA         | -5.129612421         | NA                      | +        | +              | -339.2972 | 24.520262278 | F5     |
| 0.53573599 | NA                | 2.264863e-04  | NA         | NA                   | NA                      | +        | +              | -291.2640 | 0.000000000  | F6     |
| 0.54053281 | NA                | 2.204332e-04  | NA         | -0.225809767         | NA                      | +        | +              | -290.8624 | 0.40152922   | F6     |
| 0.59074183 | NA                | NA            | NA         | NA                   | NA                      | +        | +              | -290.4113 | 0.85263178   | F6     |
| 0.59590496 | NA                | NA            | NA         | -0.350459334         | NA                      | +        | +              | -290.3574 | 0.90655227   | F6     |
| 0.53583439 | -2.862122e-05     | 2.363337e-04  | NA         | NA                   | NA                      | +        | +              | -290.0278 | 1.23612518   | F6     |
| 0.54050216 | -2.726377e-05     | 2.303237e-04  | NA         | -0.225776849         | NA                      | +        | +              | -289.6068 | 1.65715607   | F6     |
| 0.59195872 | -1.398752e-05     | NA            | NA         | NA                   | NA                      | +        | +              | -289.2447 | 2.01922231   | F6     |
| 0.59728392 | -1.526501e-05     | NA            | NA         | -0.353916779         | NA                      | +        | +              | -289.1482 | 2.11571007   | F6     |
| 0.55170497 | NA                | 2.256218e-04  | +          | NA                   | NA                      | +        | +              | -284.0541 | 7.20986072   | F6     |
| 0.57474355 | NA                | 1.986981e-04  | +          | -0.474212330         | NA                      | +        | +              | -283.6607 | 7.60320798   | F6     |
| 0.63343869 | NA                | NA            | +          | -0.595784412         | NA                      | +        | +              | -283.3761 | 7.88789257   | F6     |
| 0.61266703 | NA                | NA            | +          | NA                   | NA                      | +        | +              | -283.3272 | 7.93672470   | F6     |
| 0.54661895 | 7.640010e-05      | 2.255906e-04  | +          | NA                   | NA                      | +        | +              | -283.1260 | 8.13792760   | F6     |
| 0.56882563 | 7.637169e-05      | 1.994871e-04  | +          | -0.464781626         | NA                      | +        | +              | -282.6618 | 8.60217485   | F6     |
| 0.60684985 | 9.114338e-05      | NA            | +          | NA                   | NA                      | +        | +              | -282.5638 | 8.70015956   | F6     |
| 0.62708663 | 8.724359e-05      | NA            | +          | -0.586062424         | NA                      | +        | +              | -282.4929 | 8.77107119   | F6     |
| 0.43049785 | NA                | NA            | NA         | -0.331507359         | 0.0344933845            | +        | +              | -282.0715 | 9.19240844   | F6     |
| 0.42470905 | NA                | NA            | NA         | NA                   | 0.0346824018            | +        | +              | -281.9316 | 9.33232783   | F6     |
| 0.43267575 | -3.630496e-06     | NA            | NA         | -0.328264428         | 0.0340944405            | +        | +              | -281.5473 | 9.71666074   | F6     |
| 0.42590215 | 2.678288e-06      | NA            | NA         | NA                   | 0.0343845049            | +        | +              | -281.3902 | 9.87377987   | F6     |
| 0.30583209 | NA                | 3.906569e-04  | NA         | -0.041696924         | 0.0398239832            | +        | +              | -279.9208 | 11.34312180  | F6     |

| Intercept  | Dist. Forest edge | Dist. Roads   | Land cover | Proportion developed | Landscape heterogeneity | s(Space) | s(Time of day) | AICc      | ΔAIC        | Indiv. |
|------------|-------------------|---------------|------------|----------------------|-------------------------|----------|----------------|-----------|-------------|--------|
| 0.31119267 | -4.099861e-05     | 3.975495e-04  | NA         | -0.044424401         | 0.0391079982            | +        | +              | -279.7244 | 11.53952497 | F6     |
| 0.30097994 | NA                | 3.908771e-04  | NA         | NA                   | 0.0406980502            | +        | +              | -279.2984 | 11.96557846 | F6     |
| 0.30612653 | -3.891804e-05     | 3.976016e-04  | NA         | NA                   | 0.0399890930            | +        | +              | -279.1210 | 12.14295747 | F6     |
| 0.48471381 | NA                | NA            | +          | NA                   | 0.0373246994            | +        | +              | -274.5927 | 16.67124664 | F6     |
| 0.47608090 | 1.226857e-04      | NA            | +          | NA                   | 0.0379048278            | +        | +              | -273.5317 | 17.73227044 | F6     |
| 0.35227534 | NA                | 4.180405e-04  | +          | NA                   | 0.0450519270            | +        | +              | -271.4587 | 19.80527039 | F6     |
| 0.51975981 | NA                | NA            | +          | -0.733047996         | 0.0387492838            | +        | +              | -271.3103 | 19.95361187 | F6     |
| 0.50984333 | 1.211902e-04      | NA            | +          | -0.720260903         | 0.0392878669            | +        | +              | -270.1367 | 21.12722389 | F6     |
| 0.34812531 | 8.336899e-05      | 4.122307e-04  | +          | NA                   | 0.0453350752            | +        | +              | -269.9868 | 21.27717343 | F6     |
| 0.38880598 | NA                | 3.767122e-04  | +          | -0.442298823         | 0.0452273982            | +        | +              | -269.0214 | 22.24253594 | F6     |
| 0.38366747 | 8.585607e-05      | 3.713147e-04  | +          | -0.437116831         | 0.0453706483            | +        | +              | -267.4551 | 23.80889861 | F6     |
| 0.69677993 | NA                | -6.962629e-04 | NA         | -2.964730404         | NA                      | +        | +              | -535.3741 | 0.00000000  | F7     |
| 0.68647971 | 1.402339e-04      | -6.904601e-04 | NA         | -3.082125469         | NA                      | +        | +              | -535.2072 | 0.16688200  | F7     |
| 0.73055593 | NA                | -7.126672e-04 | NA         | -2.970593616         | -0.0051961168           | +        | +              | -534.1199 | 1.25417851  | F7     |
| 0.72124807 | 1.437931e-04      | -7.066894e-04 | NA         | -3.089925372         | -0.0054116653           | +        | +              | -533.9198 | 1.45430938  | F7     |
| 0.68664110 | NA                | -6.654918e-04 | NA         | NA                   | NA                      | +        | +              | -532.9676 | 2.40646388  | F7     |
| 0.67905986 | 1.050934e-04      | -6.623630e-04 | NA         | NA                   | NA                      | +        | +              | -532.7395 | 2.63459704  | F7     |
| 0.72152279 | NA                | -6.815654e-04 | NA         | NA                   | -0.0053980575           | +        | +              | -531.6416 | 3.73252080  | F7     |
| 0.71450356 | 1.087820e-04      | -6.779978e-04 | NA         | NA                   | -0.0055511988           | +        | +              | -531.3666 | 4.00751961  | F7     |
| 0.55331060 | NA                | NA            | NA         | -2.766978759         | NA                      | +        | +              | -529.6568 | 5.71724176  | F7     |
| 0.54162660 | 1.797493e-04      | NA            | NA         | -2.908676763         | NA                      | +        | +              | -529.6354 | 5.73870027  | F7     |
| 0.56822159 | NA                | NA            | NA         | -2.773094772         | -0.0025477993           | +        | +              | -528.3531 | 7.02101654  | F7     |
| 0.55860836 | 1.825541e-04      | NA            | NA         | -2.915033060         | -0.0029334121           | +        | +              | -528.3152 | 7.05883809  | F7     |
| 0.54975522 | NA                | NA            | NA         | NA                   | NA                      | +        | +              | -527.9776 | 7.39651231  | F7     |
| 0.54015601 | 1.454106e-04      | NA            | NA         | NA                   | NA                      | +        | +              | -527.9042 | 7.46991714  | F7     |
| 0.56630425 | NA                | NA            | NA         | NA                   | -0.0028291763           | +        | +              | -526.6712 | 8.70284907  | F7     |
| 0.55839454 | 1.484565e-04      | NA            | NA         | NA                   | -0.0031523834           | +        | +              | -526.5631 | 8.81100505  | F7     |
| 0.69686828 | NA                | -6.674341e-04 | +          | -3.045967458         | NA                      | +        | +              | -525.4252 | 9.94884609  | F7     |
| 0.69652066 | 1.672984e-04      | -6.638326e-04 | +          | -3.206047699         | NA                      | +        | +              | -525.3362 | 10.03789328 | F7     |
| 0.72436338 | NA                | -6.825299e-04 | +          | -3.053231358         | -0.0040949552           | +        | +              | -524.1670 | 11.20702867 | F7     |
| 0.72635147 | 1.723766e-04      | -6.793331e-04 | +          | -3.216584083         | -0.0044753628           | +        | +              | -524.0759 | 11.29813360 | F7     |
| 0.68465926 | NA                | -6.365051e-04 | +          | NA                   | NA                      | +        | +              | -523.0643 | 12.30975249 | F7     |
| 0.68473588 | 1.159305e-04      | -6.360972e-04 | +          | NA                   | NA                      | +        | +              | -522.8989 | 12.47521018 | F7     |
| 0.71354919 | NA                | -6.514784e-04 | +          | NA                   | -0.0043389545           | +        | +              | -521.7624 | 13.61170477 | F7     |
| 0.71516151 | 1.210306e-04      | -6.510063e-04 | +          | NA                   | -0.0045998086           | +        | +              | -521.5684 | 13.80564564 | F7     |
| 0.55182012 | 1.985586e-04      | NA            | +          | -3.035697900         | NA                      | +        | +              | -520.0936 | 15.28045800 | F7     |
| 0.55078539 | NA                | NA            | +          | -2.848291140         | NA                      | +        | +              | -520.0223 | 15.35173391 | F7     |
| 0.56296907 | 2.016194e-04      | NA            | +          | -3.044617920         | -0.0018661704           | +        | +              | -518.7384 | 16.63569156 | F7     |
| 0.55873790 | NA                | NA            | +          | -2.856924132         | -0.0013211804           | +        | +              | -518.6455 | 16.72858585 | F7     |
| 0.54522683 | NA                | NA            | +          | NA                   | NA                      | +        | +              | -518.3267 | 17.04733753 | F7     |
| 0.54591314 | 1.483336e-04      | NA            | +          | NA                   | NA                      | +        | +              | -518.3133 | 17.06074519 | F7     |
| 0.55523025 | NA                | NA            | +          | NA                   | -0.0016726164           | +        | +              | -516.9838 | 18.39024867 | F7     |
| 0.55840740 | 1.516542e-04      | NA            | +          | NA                   | -0.0020968343           | +        | +              | -516.9636 | 18.41045503 | F7     |
| 0.66974506 | NA                | NA            | +          | NA                   | NA                      | +        | +              | -179.9039 | 0.00000000  | F8     |
| 0.66977373 | NA                | NA            | +          | 0.000000000          | NA                      | +        | +              | -179.8510 | 0.05286103  | F8     |
| 0.66453342 | 2.481802e-04      | NA            | +          | NA                   | NA                      | +        | +              | -179.1405 | 0.76342113  | F8     |
| 0.66456868 | 2.480809e-04      | NA            | +          | 0.000000000          | NA                      | +        | +              | -179.0891 | 0.81482224  | F8     |
| 0.71889371 | NA                | -2.736610e-04 | +          | NA                   | NA                      | +        | +              | -178.4594 | 1.44449089  | F8     |
| 0.39159425 | NA                | NA            | NA         | NA                   | NA                      | +        | +              | -178.4186 | 1.48527180  | F8     |
| 0.71895795 | NA                | -2.738455e-04 | +          | 0.000000000          | NA                      | +        | +              | -178.4076 | 1.49632858  | F8     |
| 0.39159425 | NA                | NA            | NA         | 0.000000000          | NA                      | +        | +              | -178.3071 | 1.59684989  | F8     |
| 0.74669368 | 4.993309e-04      | -4.852330e-04 | +          | NA                   | NA                      | +        | +              | -178.1025 | 1.80138368  | F8     |
| 0.72612542 | NA                | NA            | +          | NA                   | -0.0073330583           | +        | +              | -178.0659 | 1.83803418  | F8     |
| 0.74676376 | 4.993259e-04      | -4.853813e-04 | +          | 0.000000000          | NA                      | +        | +              | -178.0490 | 1.85488524  | F8     |
| 0.72620540 | NA                | NA            | +          | 0.000000000          | -0.0073394542           | +        | +              | -178.0137 | 1.89022478  | F8     |
| 0.45627525 | NA                | -3.324385e-04 | NA         | NA                   | NA                      | +        | +              | -177.5056 | 2.39830751  | F8     |
| 0.45630945 | NA                | -3.326143e-04 | NA         | 0.000000000          | NA                      | +        | +              | -177.4070 | 2.49688125  | F8     |
| 0.70092653 | 2.220060e-04      | NA            | +          | NA                   | -0.0046661906           | +        | +              | -177.2238 | 2.68006583  | F8     |
| 0.70101088 | 2.218654e-04      | NA            | +          | 0.000000000          | -0.0046724202           | +        | +              | -177.1724 | 2.73148655  | F8     |
| 0.39068621 | NA                | NA            | NA         | NA                   | 0.0001431974            | +        | +              | -176.5172 | 3.38667587  | F8     |
| 0.40064957 | -1.490782e-04     | NA            | NA         | NA                   | NA                      | +        | +              | -176.5000 | 3.40392866  | F8     |
| 0.80149417 | NA                | -3.063919e-04 | +          | NA                   | -0.009966524            | +        | +              | -176.4700 | 3.43393036  | F8     |
| 0.80164923 | NA                | -3.066144e-04 | +          | 0.000000000          | -0.0099801242           | +        | +              | -176.4169 | 3.48703487  | F8     |

| Intercept  | Dist. Forest edge | Dist. Roads   | Land cover | Proportion developed | Landscape heterogeneity | s(Space) | s(Time of day) | AICc      | ΔAIC        | Indiv. |
|------------|-------------------|---------------|------------|----------------------|-------------------------|----------|----------------|-----------|-------------|--------|
| 0.39073782 | NA                | NA            | NA         | 0.000000000          | 0.0001350580            | +        | +              | -176.4041 | 3.49978227  | F8     |
| 0.40065637 | -1.491900e-04     | NA            | NA         | 0.000000000          | NA                      | +        | +              | -176.3768 | 3.52712267  | F8     |
| 0.79399473 | 4.693683e-04      | -4.917590e-04 | +          | NA                   | -0.0059187725           | +        | +              | -176.1528 | 3.75110993  | F8     |
| 0.79412912 | 4.693160e-04      | -4.919170e-04 | +          | 0.000000000          | -0.0059266519           | +        | +              | -176.0997 | 3.80422955  | F8     |
| 0.45610494 | -2.058964e-06     | -3.309204e-04 | NA         | NA                   | NA                      | +        | +              | -176.0111 | 3.89282357  | F8     |
| 0.45613846 | -2.073602e-06     | -3.310881e-04 | NA         | 0.000000000          | NA                      | +        | +              | -175.9114 | 3.99251650  | F8     |
| 0.47746607 | NA                | -3.430721e-04 | NA         | NA                   | -0.0030155133           | +        | +              | -175.4222 | 4.48170330  | F8     |
| 0.47758873 | NA                | -3.432933e-04 | NA         | 0.000000000          | -0.0030280695           | +        | +              | -175.3226 | 4.58131198  | F8     |
| 0.41619702 | -1.626016e-04     | NA            | NA         | NA                   | -0.0023222829           | +        | +              | -174.3364 | 5.56747625  | F8     |
| 0.41628436 | -1.627845e-04     | NA            | NA         | 0.000000000          | -0.0023343042           | +        | +              | -174.2085 | 5.69540400  | F8     |
| 0.47811517 | -1.918009e-05     | -3.344350e-04 | NA         | NA                   | -0.0031991604           | +        | +              | -173.8392 | 6.06473875  | F8     |
| 0.47824235 | -1.926705e-05     | -3.346196e-04 | NA         | 0.000000000          | -0.0032127185           | +        | +              | -173.7371 | 6.16677706  | F8     |
| 0.49582597 | -5.556896e-04     | NA            | NA         | NA                   | NA                      | +        | +              | -172.0894 | 0.00000000  | F9     |
| 0.53986938 | -5.961111e-04     | NA            | NA         | NA                   | -0.0071771559           | +        | +              | -170.2452 | 1.84418559  | F9     |
| 0.54996567 | -4.976312e-04     | -2.771063e-04 | NA         | NA                   | NA                      | +        | +              | -169.8915 | 2.19784310  | F9     |
| 0.50215794 | -5.665291e-04     | NA            | NA         | -0.325621126         | NA                      | +        | +              | -168.9017 | 3.18763074  | F9     |
| 0.59957034 | -5.417400e-04     | -2.815552e-04 | NA         | NA                   | -0.0079383899           | +        | +              | -168.0730 | 4.01635596  | F9     |
| 0.54837046 | -6.092219e-04     | NA            | NA         | -0.341280358         | -0.0074805894           | +        | +              | -166.9873 | 5.10210176  | F9     |
| 0.55506035 | -5.085566e-04     | -2.730311e-04 | NA         | -0.302983350         | NA                      | +        | +              | -166.8797 | 5.20968427  | F9     |
| 0.60656517 | -5.547654e-04     | -2.773457e-04 | NA         | -0.319268093         | -0.0082001412           | +        | +              | -164.9945 | 7.09483740  | F9     |
| 0.66175837 | -4.764166e-04     | NA            | +          | NA                   | NA                      | +        | +              | -164.9465 | 7.14281505  | F9     |
| 0.46125787 | NA                | NA            | NA         | NA                   | NA                      | +        | +              | -164.8744 | 7.21492780  | F9     |
| 0.53422762 | NA                | -3.501281e-04 | NA         | NA                   | NA                      | +        | +              | -164.4048 | 7.68456996  | F9     |
| 0.44446346 | NA                | NA            | NA         | NA                   | 0.0029024643            | +        | +              | -163.5993 | 8.49009714  | F9     |
| 0.73129543 | -4.150145e-04     | -3.273969e-04 | +          | NA                   | NA                      | +        | +              | -163.3008 | 8.78855633  | F9     |
| 0.68567926 | -5.101382e-04     | NA            | +          | NA                   | -0.0045933858           | +        | +              | -163.1095 | 8.97989780  | F9     |
| 0.52858376 | NA                | -3.488156e-04 | NA         | NA                   | 0.0009281169            | +        | +              | -162.9797 | 9.10960799  | F9     |
| 0.46361708 | NA                | NA            | NA         | -0.135782042         | NA                      | +        | +              | -162.3001 | 9.78923351  | F9     |
| 0.53620065 | NA                | -3.487838e-04 | NA         | -0.129680218         | NA                      | +        | +              | -161.9391 | 10.15029601 | F9     |
| 0.75998126 | -4.546404e-04     | -3.299564e-04 | +          | NA                   | -0.0054337715           | +        | +              | -161.4455 | 10.64384411 | F9     |
| 0.70470821 | -4.737896e-04     | NA            | +          | -0.664463368         | NA                      | +        | +              | -161.0685 | 11.02083529 | F9     |
| 0.44677671 | NA                | NA            | NA         | -0.129874464         | 0.0028926684            | +        | +              | -161.0675 | 11.02185292 | F9     |
| 0.75047679 | NA                | -3.723786e-04 | +          | NA                   | NA                      | +        | +              | -160.6231 | 11.46623748 | F9     |
| 0.53047658 | NA                | -3.475335e-04 | NA         | -0.124655717         | 0.0009291314            | +        | +              | -160.5474 | 11.54192259 | F9     |
| 0.67185384 | NA                | NA            | +          | NA                   | NA                      | +        | +              | -160.3708 | 11.71852642 | F9     |
| 0.77016320 | -4.147112e-04     | -3.181135e-04 | +          | -0.628643763         | NA                      | +        | +              | -159.7104 | 12.37896517 | F9     |
| 0.73547477 | NA                | -3.690328e-04 | +          | NA                   | 0.0027192299            | +        | +              | -159.3642 | 12.72511113 | F9     |
| 0.64701297 | NA                | NA            | +          | NA                   | 0.0046838733            | +        | +              | -159.3504 | 12.73896082 | F9     |
| 0.72763771 | -5.069862e-04     | NA            | +          | -0.659425738         | -0.0044795905           | +        | +              | -159.2950 | 12.79439999 | F9     |
| 0.79758786 | -4.535390e-04     | -3.206138e-04 | +          | -0.622586989         | -0.0052827496           | +        | +              | -157.9219 | 14.16747644 | F9     |
| 0.78865478 | NA                | -3.615461e-04 | +          | -0.619600683         | NA                      | +        | +              | -156.4995 | 15.58983142 | F9     |
| 0.71511659 | NA                | NA            | +          | -0.664435847         | NA                      | +        | +              | -155.8328 | 16.25654112 | F9     |
| 0.77262618 | NA                | -3.582062e-04 | +          | -0.618078076         | 0.0028959539            | +        | +              | -155.3122 | 16.77711442 | F9     |
| 0.68971370 | NA                | NA            | +          | -0.663052706         | 0.0047797706            | +        | +              | -154.9028 | 17.18654261 | F9     |
| 0.62551041 | NA                | -4.539630e-04 | NA         | NA                   | NA                      | +        | +              | -433.7438 | 0.00000000  | F10    |
| 0.63063908 | NA                | -4.593714e-04 | NA         | NA                   | -0.0007632462           | +        | +              | -432.2543 | 1.48952605  | F10    |
| 0.61425762 | NA                | -4.407719e-04 | NA         | 0.181135169          | NA                      | +        | +              | -432.0142 | 1.72954079  | F10    |
| 0.62410602 | -2.130360e-04     | -3.831129e-04 | NA         | NA                   | NA                      | +        | +              | -431.7195 | 2.02428231  | F10    |
| 0.61743645 | NA                | -4.446750e-04 | NA         | 0.179597066          | -0.0004433790           | +        | +              | -430.5759 | 3.16791917  | F10    |
| 0.61610271 | -1.958731e-04     | -3.800040e-04 | NA         | 0.132864001          | NA                      | +        | +              | -430.2730 | 3.47077158  | F10    |
| 0.64077577 | -2.200138e-04     | -3.957285e-04 | NA         | NA                   | -0.0025647971           | +        | +              | -429.9650 | 3.77877214  | F10    |
| 0.55281369 | NA                | NA            | NA         | NA                   | NA                      | +        | +              | -429.3677 | 4.37605872  | F10    |
| 0.63056777 | -2.022551e-04     | -3.911723e-04 | NA         | 0.127882573          | -0.0021715013           | +        | +              | -428.5998 | 5.14399114  | F10    |
| 0.53956117 | NA                | NA            | NA         | 0.262624879          | NA                      | +        | +              | -427.5614 | 6.18237266  | F10    |
| 0.50773455 | NA                | NA            | NA         | NA                   | 0.0080717495            | +        | +              | -427.3474 | 6.39638164  | F10    |
| 0.56978277 | -3.636333e-04     | NA            | NA         | NA                   | NA                      | +        | +              | -426.4968 | 7.24696757  | F10    |
| 0.49353088 | NA                | NA            | NA         | 0.265748188          | 0.0082138411            | +        | +              | -425.4472 | 8.29659937  | F10    |
| 0.54791895 | -3.457163e-04     | NA            | NA         | NA                   | 0.0037651665            | +        | +              | -425.4213 | 8.32245956  | F10    |
| 0.56058084 | -3.411642e-04     | NA            | NA         | 0.161575934          | NA                      | +        | +              | -425.0470 | 8.69677269  | F10    |
| 0.53624778 | -3.208739e-04     | NA            | NA         | 0.167756441          | 0.0041316266            | +        | +              | -423.9563 | 9.78750525  | F10    |
| 0.66268338 | NA                | -4.052012e-04 | +          | NA                   | NA                      | +        | +              | -419.4652 | 14.27859934 | F10    |
| 0.64729337 | -2.192566e-04     | -3.485131e-04 | +          | NA                   | NA                      | +        | +              | -418.7321 | 15.01168947 | F10    |
| 0.65164353 | NA                | -4.045073e-04 | +          | 0.094484792          | NA                      | +        | +              | -418.5005 | 15.24329684 | F10    |

| Intercept  | Dist. Forest edge | Dist. Roads   | Land cover | Proportion developed | Landscape heterogeneity | s(Space) | s(Time of day) | AICc      | ΔAIC        | Indiv. |
|------------|-------------------|---------------|------------|----------------------|-------------------------|----------|----------------|-----------|-------------|--------|
| 0.64903746 | NA                | -3.939662e-04 | +          | NA                   | 0.0020880829            | +        | +              | -417.9738 | 15.76993716 | F10    |
| 0.63949580 | -2.149203e-04     | -3.501711e-04 | +          | 0.070583881          | NA                      | +        | +              | -417.7889 | 15.95487883 | F10    |
| 0.64984814 | -2.211906e-04     | -3.519824e-04 | +          | NA                   | -0.0003938543           | +        | +              | -417.1003 | 16.64348622 | F10    |
| 0.63772092 | NA                | -3.931119e-04 | +          | 0.095191348          | 0.0021275458            | +        | +              | -417.0360 | 16.70781275 | F10    |
| 0.64136446 | -2.163072e-04     | -3.530649e-04 | +          | 0.070180838          | -0.0002723475           | +        | +              | -416.1773 | 17.56648683 | F10    |
| 0.59258318 | NA                | NA            | +          | NA                   | NA                      | +        | +              | -413.4978 | 20.24601893 | F10    |
| 0.58430412 | -3.590319e-04     | NA            | +          | NA                   | NA                      | +        | +              | -413.0596 | 20.68417377 | F10    |
| 0.57651192 | NA                | NA            | +          | 0.142155113          | NA                      | +        | +              | -412.8532 | 20.89059492 | F10    |
| 0.57387021 | -3.526058e-04     | NA            | +          | 0.091858534          | NA                      | +        | +              | -412.2923 | 21.45143396 | F10    |
| 0.55274796 | -3.190384e-04     | NA            | +          | NA                   | 0.0059033633            | +        | +              | -411.8516 | 21.89213217 | F10    |
| 0.53393972 | NA                | NA            | +          | NA                   | 0.0108349351            | +        | +              | -411.1298 | 22.61394957 | F10    |
| 0.54162011 | -3.125506e-04     | NA            | +          | 0.095421272          | 0.0059665406            | +        | +              | -411.0738 | 22.66994326 | F10    |
| 0.51886362 | NA                | NA            | +          | 0.137728403          | 0.0107104621            | +        | +              | -410.4042 | 23.33959264 | F10    |
| 0.37447853 | NA                | NA            | NA         | NA                   | 0.0187873591            | +        | +              | -160.8217 | 0.00000000  | F11    |
| 0.46747139 | NA                | NA            | NA         | NA                   | NA                      | +        | +              | -160.2879 | 0.53384267  | F11    |
| 0.37348906 | NA                | NA            | NA         | 0.383157836          | 0.0187480617            | +        | +              | -160.1996 | 0.62215738  | F11    |
| 0.46626990 | NA                | NA            | NA         | 0.388822889          | NA                      | +        | +              | -159.7585 | 1.06322325  | F11    |
| 0.40580580 | -2.473261e-04     | NA            | NA         | NA                   | 0.0162747424            | +        | +              | -158.4484 | 2.37331699  | F11    |
| 0.49099957 | -3.080466e-04     | NA            | NA         | NA                   | NA                      | +        | +              | -157.8774 | 2.94431138  | F11    |
| 0.40458063 | -2.466527e-04     | NA            | NA         | 0.382415594          | 0.0162731355            | +        | +              | -157.8052 | 3.01649818  | F11    |
| 0.47402513 | NA                | -3.887832e-04 | NA         | NA                   | 0.0182786774            | +        | +              | -157.5016 | 3.32013350  | F11    |
| 0.48972784 | -3.069124e-04     | NA            | NA         | 0.383517737          | NA                      | +        | +              | -157.2917 | 3.53007672  | F11    |
| 0.56659392 | NA                | -3.971727e-04 | NA         | NA                   | NA                      | +        | +              | -157.2660 | 3.55576368  | F11    |
| 0.47002998 | NA                | -3.763295e-04 | NA         | 0.300988276          | 0.0182699920            | +        | +              | -156.7696 | 4.05213053  | F11    |
| 0.56252511 | NA                | -3.845972e-04 | NA         | 0.301074787          | NA                      | +        | +              | -156.5727 | 4.24907995  | F11    |
| 0.49072772 | -1.923520e-04     | -3.560044e-04 | NA         | NA                   | 0.0162196674            | +        | +              | -155.4853 | 5.33647004  | F11    |
| 0.57544190 | -2.533798e-04     | -3.550811e-04 | NA         | NA                   | NA                      | +        | +              | -155.1553 | 5.66643805  | F11    |
| 0.48655303 | -1.930209e-04     | -3.430866e-04 | NA         | 0.306919890          | 0.0162304669            | +        | +              | -154.7417 | 6.08007156  | F11    |
| 0.57129609 | -2.537584e-04     | -3.421441e-04 | NA         | 0.306159912          | NA                      | +        | +              | -154.4304 | 6.39135689  | F11    |
| 0.40351119 | NA                | NA            | +          | NA                   | NA                      | +        | +              | -152.8895 | 7.93225026  | F11    |
| 0.42261014 | -6.629329e-04     | NA            | +          | NA                   | NA                      | +        | +              | -152.5638 | 8.25795670  | F11    |
| 0.38185832 | NA                | NA            | +          | 0.453381512          | NA                      | +        | +              | -152.4158 | 8.40594082  | F11    |
| 0.31765350 | -5.509065e-04     | NA            | +          | NA                   | 0.0212919561            | +        | +              | -151.9512 | 8.87050991  | F11    |
| 0.39635701 | -6.625842e-04     | NA            | +          | 0.436050033          | NA                      | +        | +              | -151.7950 | 9.02677494  | F11    |
| 0.27582894 | NA                | NA            | +          | NA                   | 0.0271734420            | +        | +              | -151.4304 | 9.39137747  | F11    |
| 0.28860934 | -5.512417e-04     | NA            | +          | 0.442395112          | 0.0214213942            | +        | +              | -151.0311 | 9.79061412  | F11    |
| 0.25061213 | NA                | NA            | +          | 0.444069748          | 0.0271918161            | +        | +              | -150.6592 | 10.16252661 | F11    |
| 0.48381476 | -6.613839e-04     | -4.067244e-04 | +          | NA                   | NA                      | +        | +              | -150.5929 | 10.22879084 | F11    |
| 0.46575446 | NA                | -3.961001e-04 | +          | NA                   | NA                      | +        | +              | -150.0446 | 10.77713739 | F11    |
| 0.38334671 | -5.580842e-04     | -3.657449e-04 | +          | NA                   | 0.0188766147            | +        | +              | -149.9352 | 10.88655579 | F11    |
| 0.45570559 | -6.618689e-04     | -3.961460e-04 | +          | 0.379668879          | NA                      | +        | +              | -149.6643 | 11.15741279 | F11    |
| 0.44204412 | NA                | -3.839882e-04 | +          | 0.390710500          | NA                      | +        | +              | -149.4146 | 11.40712301 | F11    |
| 0.35184082 | -5.582883e-04     | -3.547820e-04 | +          | 0.394558443          | 0.0191013834            | +        | +              | -148.9501 | 11.87166299 | F11    |
| 0.33719993 | NA                | -3.496370e-04 | +          | NA                   | 0.0255412184            | +        | +              | -148.7621 | 12.05958963 | F11    |
| 0.30944127 | NA                | -3.384725e-04 | +          | 0.396643815          | 0.0256536008            | +        | +              | -147.9206 | 12.90117424 | F11    |
| 0.51887994 | -2.883929e-04     | NA            | +          | NA                   | 0.0279665524            | +        | +              | -539.3394 | 0.00000000  | F12    |
| 0.50893533 | -2.972261e-04     | NA            | +          | -0.912479939         | 0.0284812892            | +        | +              | -537.8103 | 1.52907268  | F12    |
| 0.53783006 | -2.588108e-04     | -8.832322e-05 | +          | NA                   | 0.0267753179            | +        | +              | -537.4385 | 1.90096230  | F12    |
| 0.52836996 | -2.666986e-04     | -9.195519e-05 | +          | -0.940249892         | 0.0272591453            | +        | +              | -535.9759 | 3.36353334  | F12    |
| 0.52977837 | NA                | NA            | +          | NA                   | 0.0287165145            | +        | +              | -535.8267 | 3.51272277  | F12    |
| 0.56338547 | NA                | -1.656126e-04 | +          | NA                   | 0.0262895522            | +        | +              | -534.4277 | 4.91174320  | F12    |
| 0.52243584 | NA                | NA            | +          | -0.700858512         | 0.0291322073            | +        | +              | -533.3254 | 6.01398958  | F12    |
| 0.55611931 | NA                | -1.706029e-04 | +          | -0.790172338         | 0.0266904318            | +        | +              | -532.0185 | 7.32093340  | F12    |
| 0.66127207 | -3.190726e-04     | NA            | +          | NA                   | NA                      | +        | +              | -531.2864 | 8.05303559  | F12    |
| 0.65699706 | -3.246170e-04     | NA            | +          | -0.528070725         | NA                      | +        | +              | -529.4558 | 9.88364576  | F12    |
| 0.69058520 | -2.447495e-04     | -2.022128e-04 | +          | NA                   | NA                      | +        | +              | -529.0335 | 10.30593596 | F12    |
| 0.68609880 | -2.499804e-04     | -2.057972e-04 | +          | -0.622787618         | NA                      | +        | +              | -527.3068 | 12.03262684 | F12    |
| 0.67777476 | NA                | NA            | +          | NA                   | NA                      | +        | +              | -525.6584 | 13.68103647 | F12    |
| 0.71229632 | NA                | -2.740815e-04 | +          | NA                   | NA                      | +        | +              | -525.3308 | 14.00863906 | F12    |
| 0.67563873 | NA                | NA            | +          | -0.286734507         | NA                      | +        | +              | -523.2276 | 16.11183609 | F12    |
| 0.70918890 | NA                | -2.780392e-04 | +          | -0.485806990         | NA                      | +        | +              | -522.8863 | 16.45312770 | F12    |
| 0.26933204 | -3.245694e-04     | NA            | NA         | NA                   | 0.0280434768            | +        | +              | -522.6928 | 16.64658072 | F12    |
| 0.26711953 | -3.297459e-04     | NA            | NA         | -0.793880709         | 0.0285187145            | +        | +              | -521.0674 | 18.27204765 | F12    |

| Intercept  | Dist. Forest edge | Dist. Roads   | Land cover | Proportion developed | Landscape heterogeneity | s(Space) | s(Time of day) | AICc      | ΔAIC        | Indiv. |
|------------|-------------------|---------------|------------|----------------------|-------------------------|----------|----------------|-----------|-------------|--------|
| 0.30152924 | -2.716365e-04     | -1.482130e-04 | NA         | NA                   | 0.0261960257            | +        | +              | -520.3043 | 19.03513623 | F12    |
| 0.30005825 | -2.757050e-04     | -1.524262e-04 | NA         | -0.849844219         | 0.0266555479            | +        | +              | -518.7741 | 20.56531774 | F12    |
| 0.25492832 | NA                | NA            | NA         | NA                   | 0.0288054423            | +        | +              | -516.8569 | 22.48250406 | F12    |
| 0.31395511 | NA                | -2.517756e-04 | NA         | NA                   | 0.0253959181            | +        | +              | -515.7086 | 23.63086136 | F12    |
| 0.25305306 | NA                | NA            | NA         | -0.597815848         | 0.0291788266            | +        | +              | -514.4302 | 24.90919148 | F12    |
| 0.31275826 | NA                | -2.568022e-04 | NA         | -0.744326190         | 0.0257998544            | +        | +              | -513.7614 | 25.57800066 | F12    |
| 0.42935655 | -3.433184e-04     | NA            | NA         | NA                   | NA                      | +        | +              | -513.3544 | 25.98499686 | F12    |
| 0.42960529 | -3.461001e-04     | NA            | NA         | -0.392097660         | NA                      | +        | +              | -511.3998 | 27.93964078 | F12    |
| 0.46633484 | -2.484470e-04     | -2.535567e-04 | NA         | NA                   | NA                      | +        | +              | -510.7751 | 28.56432985 | F12    |
| 0.46718321 | -2.508920e-04     | -2.570774e-04 | NA         | -0.526671840         | NA                      | +        | +              | -508.9397 | 30.39969446 | F12    |
| 0.47308685 | NA                | -3.454051e-04 | NA         | NA                   | NA                      | +        | +              | -505.8649 | 33.47453662 | F12    |
| 0.41870324 | NA                | NA            | NA         | NA                   | NA                      | +        | +              | -505.3452 | 33.99417342 | F12    |
| 0.47383732 | NA                | -3.490281e-04 | NA         | -0.434642888         | NA                      | +        | +              | -503.7627 | 35.57676665 | F12    |
| 0.41877548 | NA                | NA            | NA         | -0.174410412         | NA                      | +        | +              | -503.0267 | 36.31267011 | F12    |
